# Supplementary material
Source: PubMed Central journal article supplement (PMC3931077)
Supplement: supp_M113.487736_jbc.M113.487736-1.pdf [file supp_M113.487736_jbc.M113.487736-1.pdf]

## SUPPLEMENTAL DATA

A novel SIRT2 inhibitor with p53-dependent pro-apoptotic activity in non-small-cell lung cancer \*

**Gesine Hoffmann<sup>1#</sup>, Frank Breitenbücher<sup>2</sup>, Martin Schuler<sup>2,3</sup> and Ann E. Ehrenhofer-Murray<sup>1#</sup>**

<sup>1</sup>Zentrum für Medizinische Biotechnologie, Universität Duisburg-Essen, Essen, Germany,

<sup>2</sup>Innere Klinik (Tumorforschung), Westdeutsches Tumorzentrum, Universitätsklinikum Essen, Essen, Germany, <sup>3</sup>German Cancer Consortium (DKTK), Heidelberg, Germany

<sup>#</sup> Current address: Humboldt-Universität zu Berlin, Institut für Biologie, Abteilung Molekulare Zellbiologie, Berlin, Germany

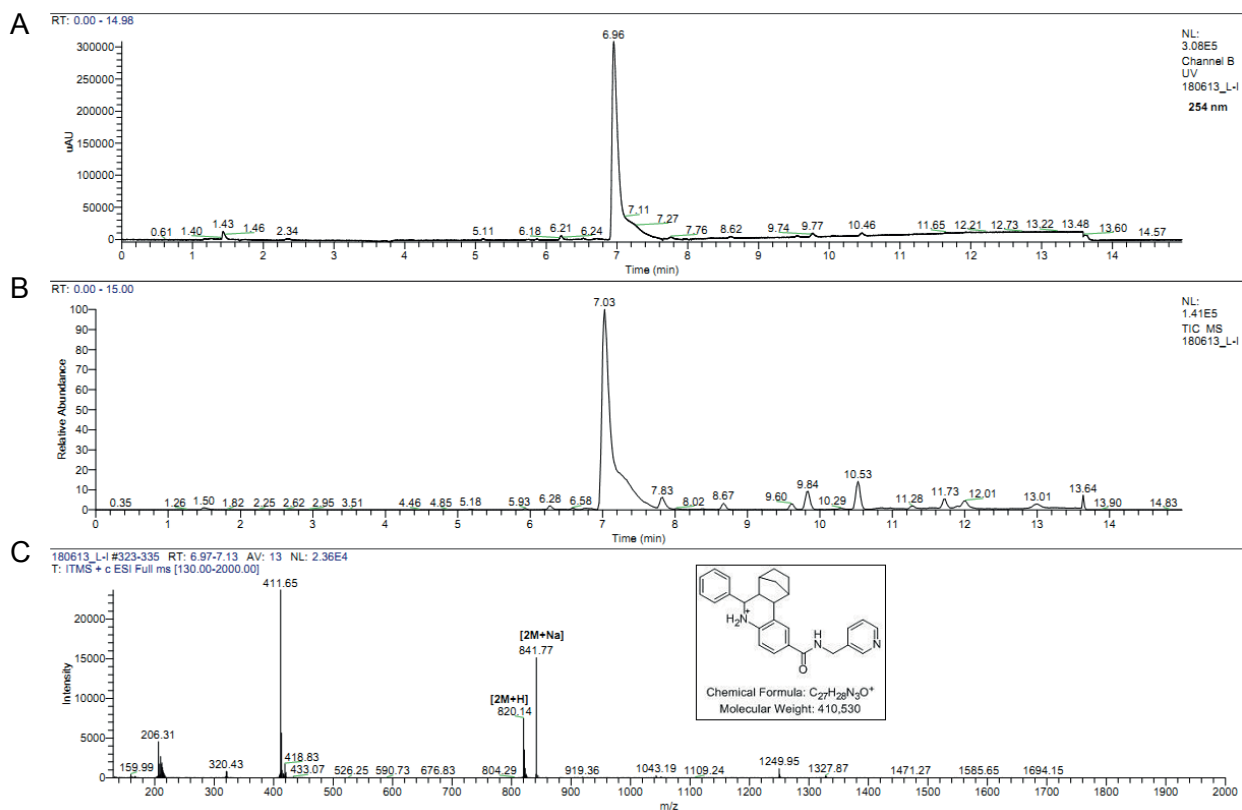

Supplemental Figure S1: LC/MS analysis of the SIRT2 inhibitor AEM2. (A) UV-Chromatogram, (B) total ion current chromatogram and (C) thermal ionization mass spectrometry of AEM2.

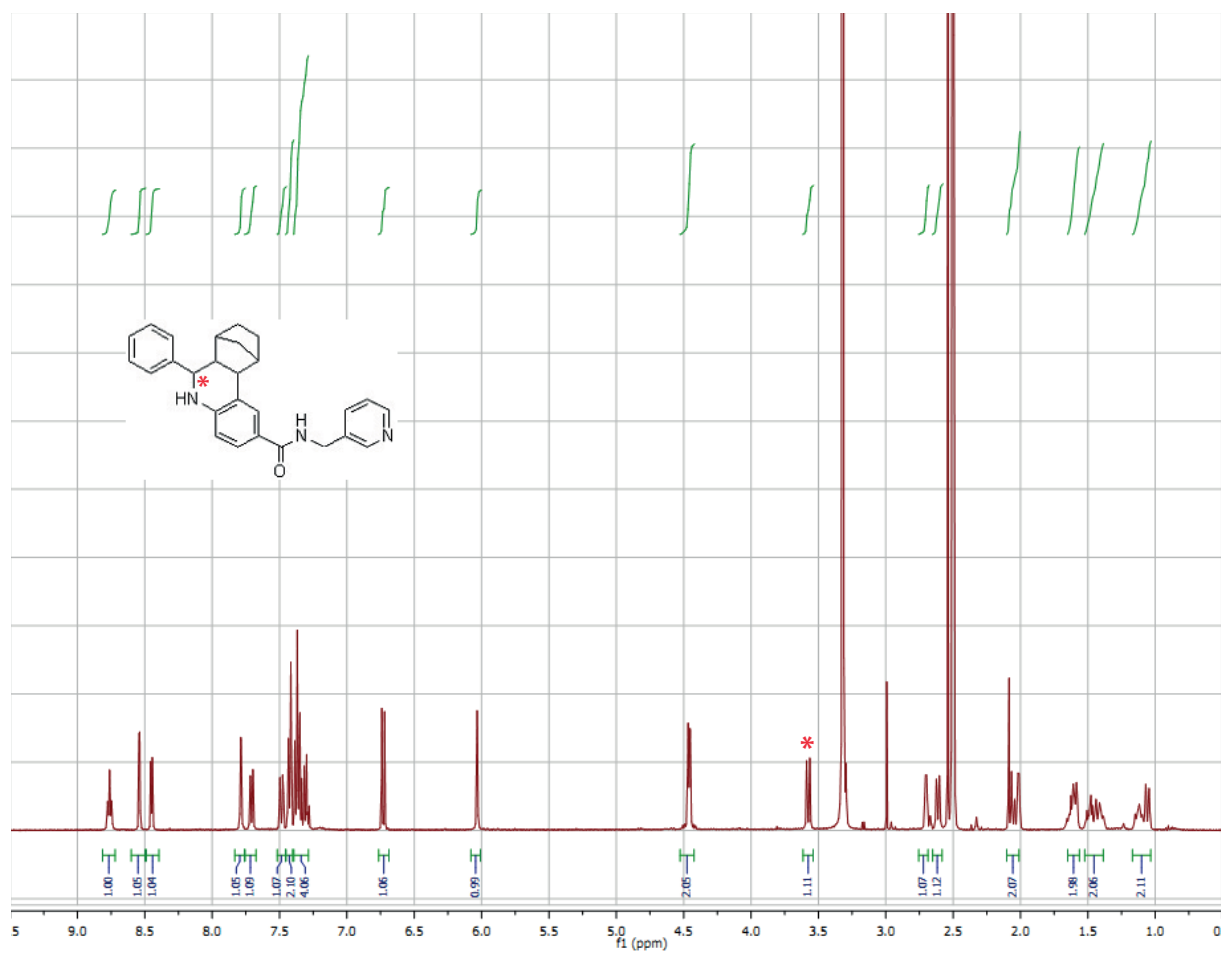

Supplemental Figure S2: <sup>1</sup>H NMR spectrum of AEM2.
